# Supplementary material for: Phytochemical Compositions of Some Red Sea Halophyte Plants with Antioxidant and Anticancer Potentials
Source: MDPI journal article supplement (doi:10.3390/molecules27113415), 2022-05-25
Supplement: s1 [file s1]

## Supplementary Materials

**Figure S1:** Monosaccharide compositions spectrum of *Anabasis ehrenbergii*

**Figure S2:** Monosaccharide compositions spectrum of *Suaeda aegyptiaca*

**Figure S3:** Monosaccharide compositions spectrum of *Suaeda monoica*

**Figure S4:** Monosaccharide compositions spectrum of *Zygophyllum album*

**Figure S5:** Amino acids compositions spectrum of *Anabasis ehrenbergii*

**Figure S6:** Amino acids compositions spectrum of *Suaeda aegyptiaca*

**Figure S7:** Amino acids compositions spectrum of *Suaeda monoica*

**Figure S8:** Amino acids compositions spectrum of *Zygophyllum album*

**Figure S9:** Phenolic compositions spectrum of *Anabasis ehrenbergii*

**Figure S10:** Phenolic compositions spectrum of *Suaeda aegyptiaca*

**Figure S11:** Phenolic compositions spectrum of *Suaeda monoica*

**Figure S12:** Phenolic compositions spectrum of *Zygophyllum album*

**Figure S13:** Fatty acids compositions spectrum of *Anabasis ehrenbergii*

**Figure S14:** Fatty acids compositions spectrum of *Suaeda aegyptiaca*

**Figure S15:** Fatty acids compositions spectrum of *Suaeda monoica*

**Figure S16:** Fatty acids compositions spectrum of *Zygophyllum album*

**Figure S17:** Unsaponifiable matter compositions spectrum of *Anabasis ehrenbergii*

**Figure S18:** Unsaponifiable matter compositions spectrum of *Suaeda aegyptiaca*

**Figure S19:** Unsaponifiable matter compositions spectrum of *Suaeda monoica*

**Figure S20:** Unsaponifiable matter compositions spectrum of *Zygophyllum album*

# 1. Polysaccharide analysis:

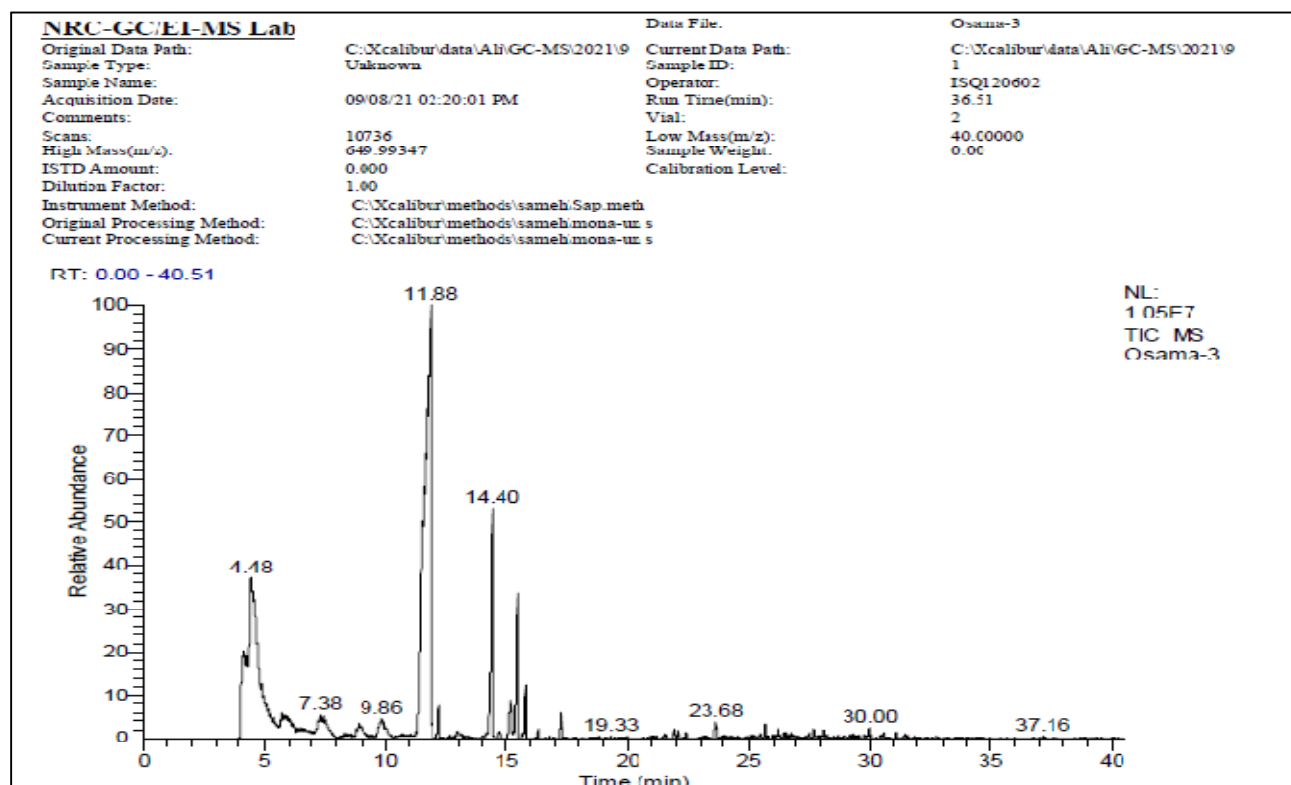

Figure S1: Monosaccharide compositions spectrum of *Anabasis ehrenbergii*

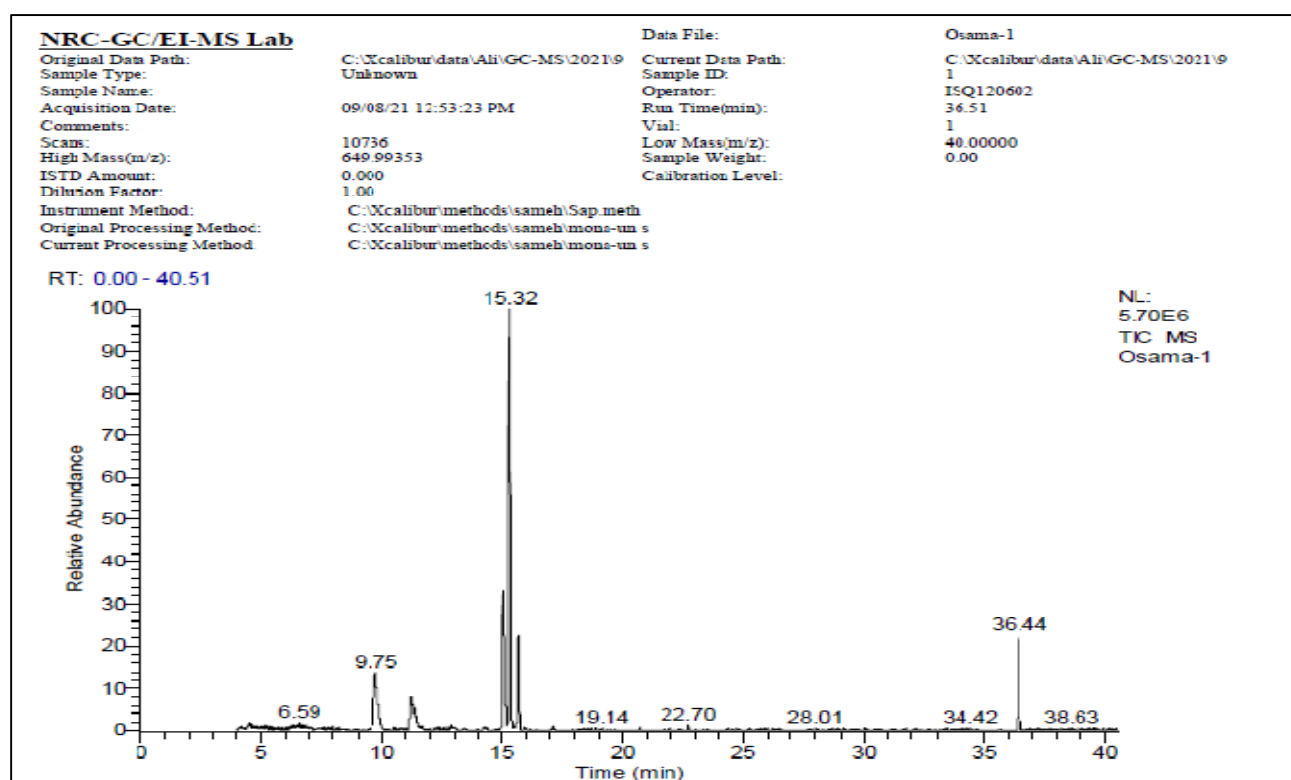

Figure S2: Monosaccharide compositions spectrum of *Suaeda aegyptiaca*

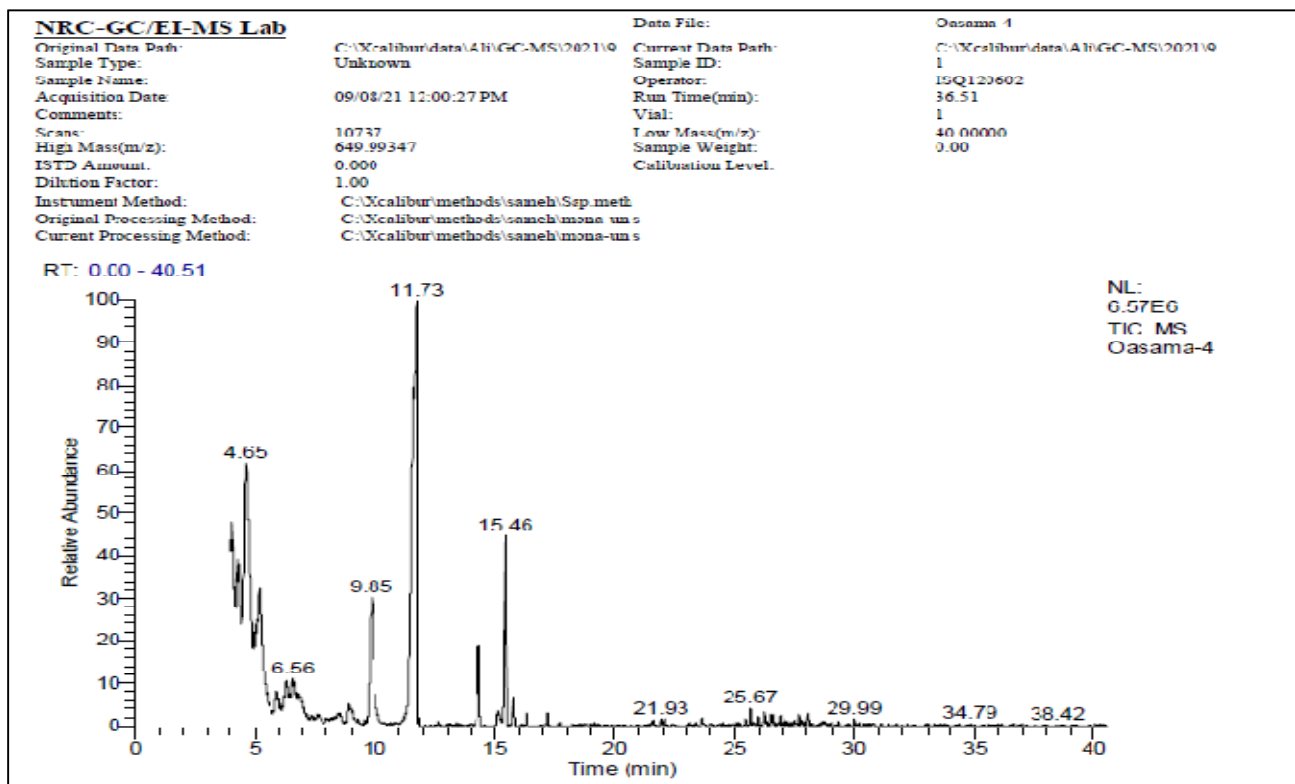

Figure S3: Monosaccharide compositions spectrum of *Suaeda monoica*

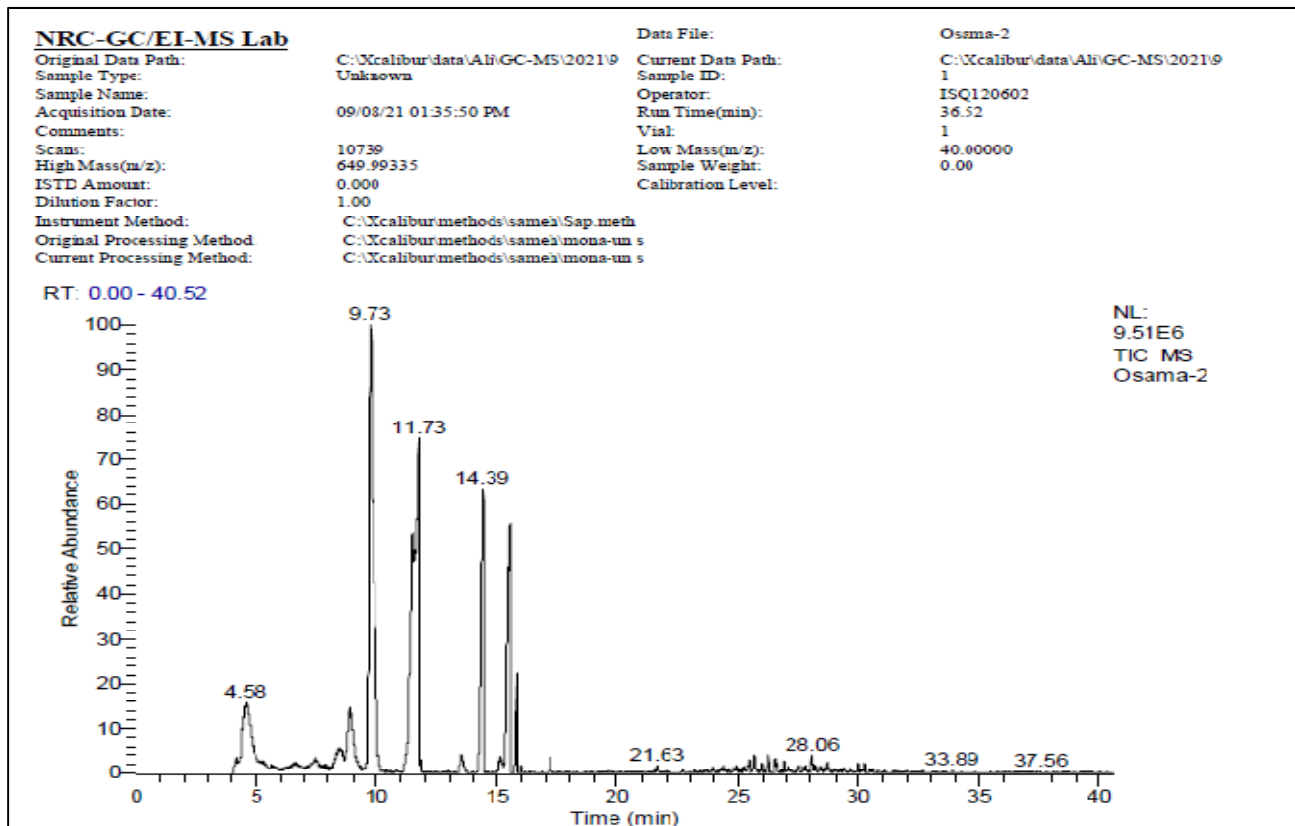

Figure S4: Monosaccharide compositions spectrum of *Zygophyllum album*

## 2. Amino acids compositions:

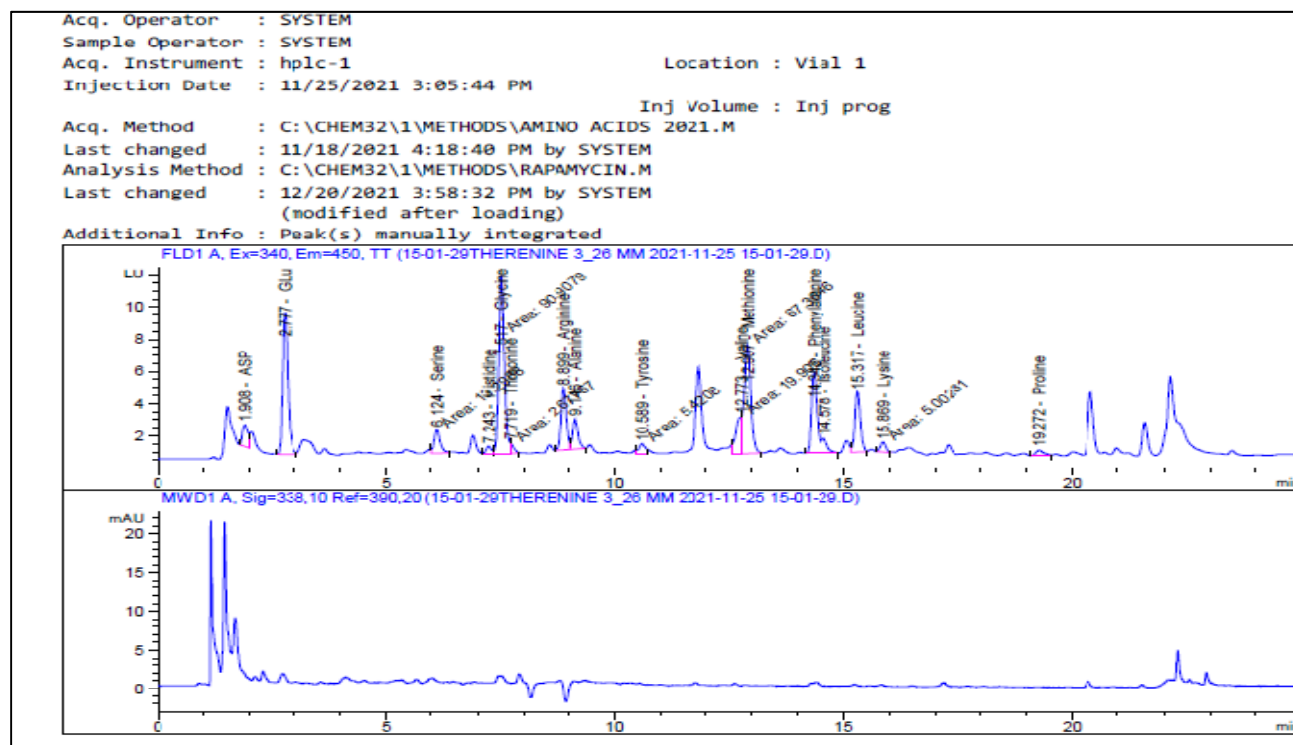

Figure S5: Amino acids compositions spectrum of *Anabasis ehrenbergii*

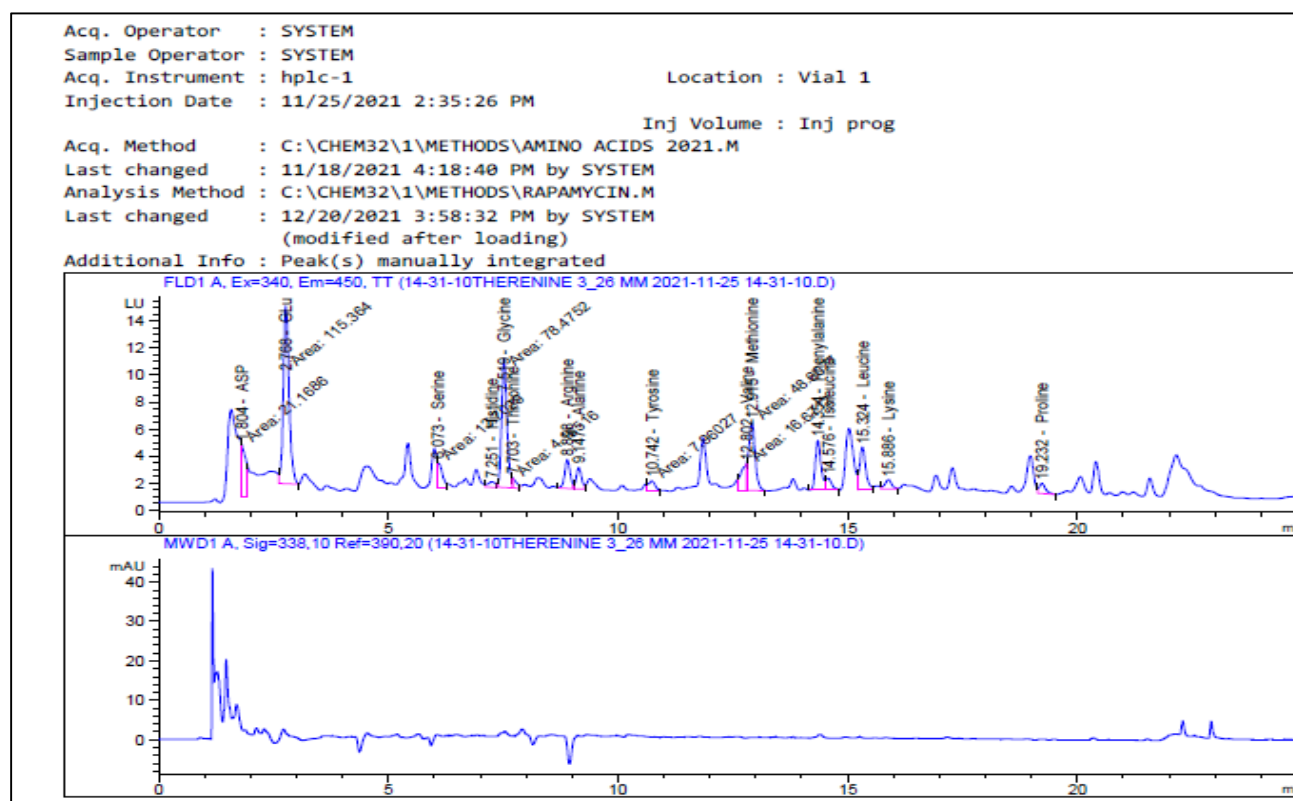

Figure S6: Amino acids compositions spectrum of *Suaeda aegyptiaca*

Acq. Operator : SYSTEM  
 Sample Operator : SYSTEM  
 Acq. Instrument : hplc-1  
 Injection Date : 11/25/2021 4:25:06 PM  
 Location : Vial 1  
 Inj Volume : Inj prog  
 Acq. Method : C:\CHEM32\1\METHODS\AMINO ACIDS 2021.M  
 Last changed : 11/18/2021 4:18:40 PM by SYSTEM  
 Analysis Method : C:\CHEM32\1\METHODS\RAPAMYCIN.M  
 Last changed : 12/20/2021 3:58:32 PM by SYSTEM  
 (modified after loading)  
 Additional Info : Peak(s) manually integrated

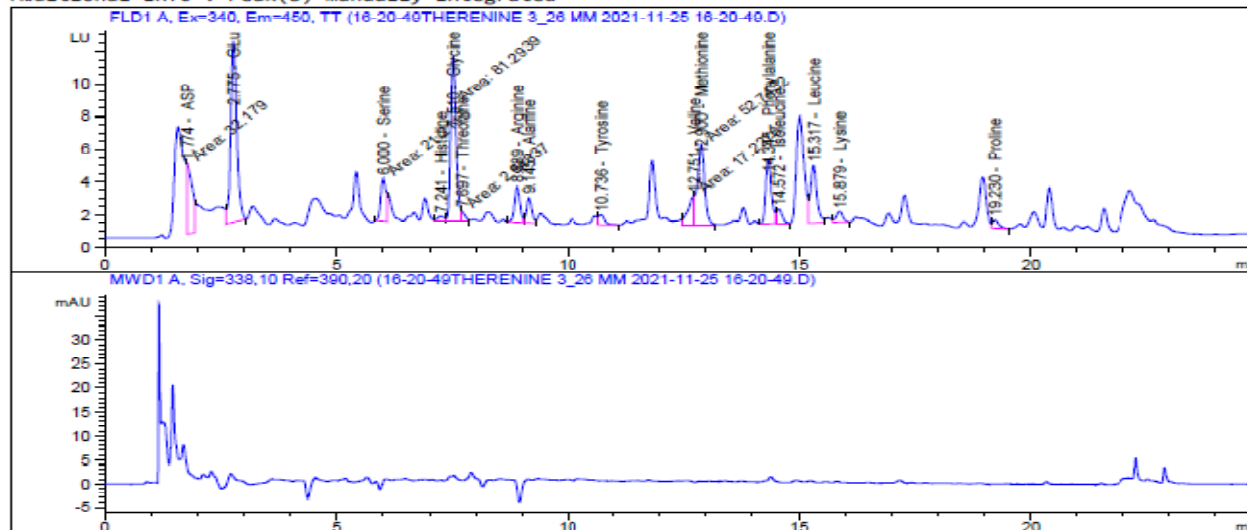

Figure S7: Amino acids compositions spectrum of *Saueda monoica*

Acq. Operator : SYSTEM  
 Sample Operator : SYSTEM  
 Acq. Instrument : hplc-1  
 Injection Date : 11/25/2021 3:35:43 PM  
 Location : Vial 1  
 Inj Volume : Inj prog  
 Acq. Method : C:\CHEM32\1\METHODS\AMINO ACIDS 2021.M  
 Last changed : 11/18/2021 4:18:40 PM by SYSTEM  
 Analysis Method : C:\CHEM32\1\METHODS\RAPAMYCIN.M  
 Last changed : 12/20/2021 3:58:32 PM by SYSTEM  
 (modified after loading)  
 Additional Info : Peak(s) manually integrated

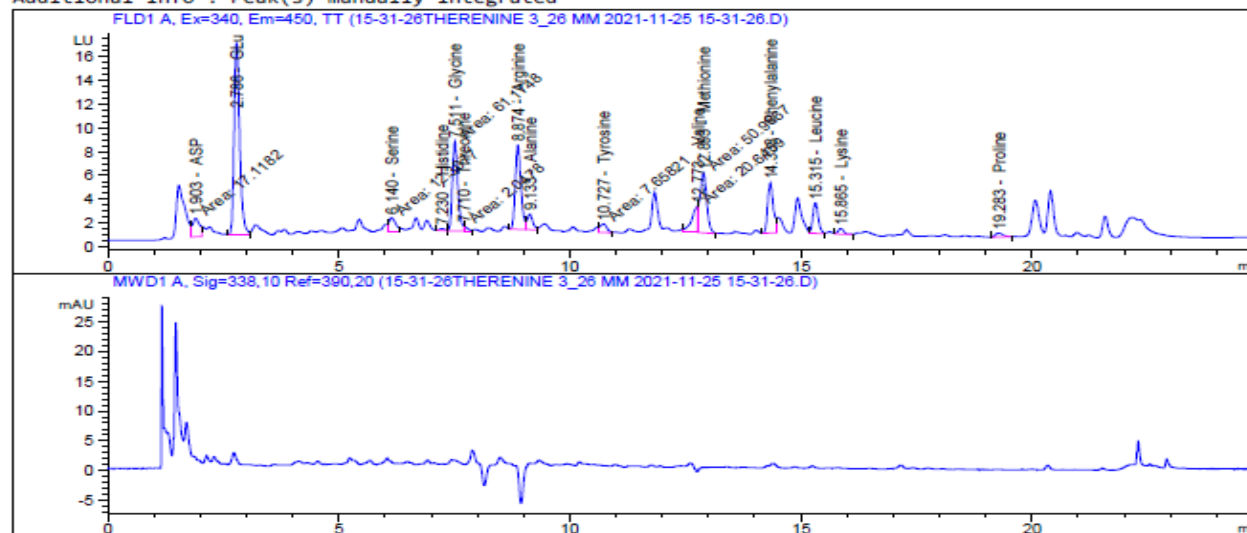

Figure S8: Amino acids compositions spectrum of *Zygothallum album*

### 3. Polyphenol compositions:

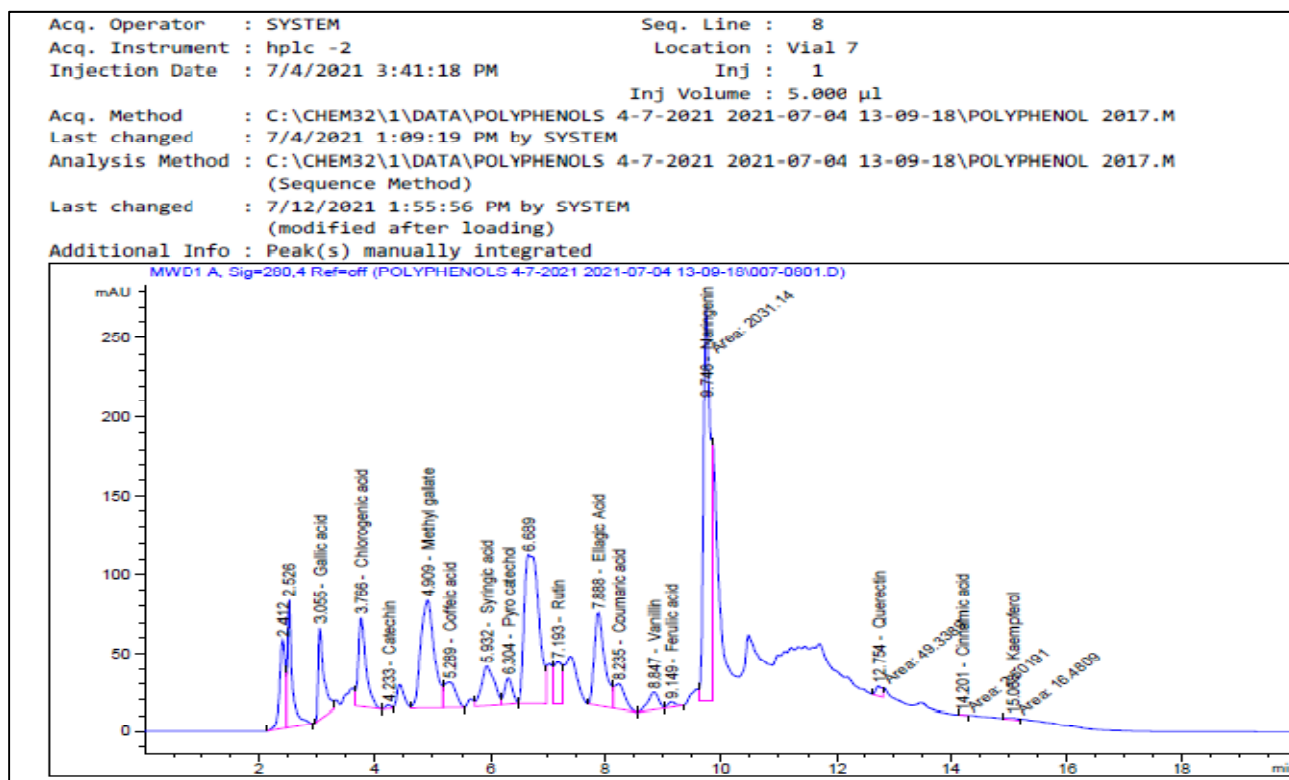

Figure S9: Phenolic compositions spectrum of *Anabasis ehrenbergii*

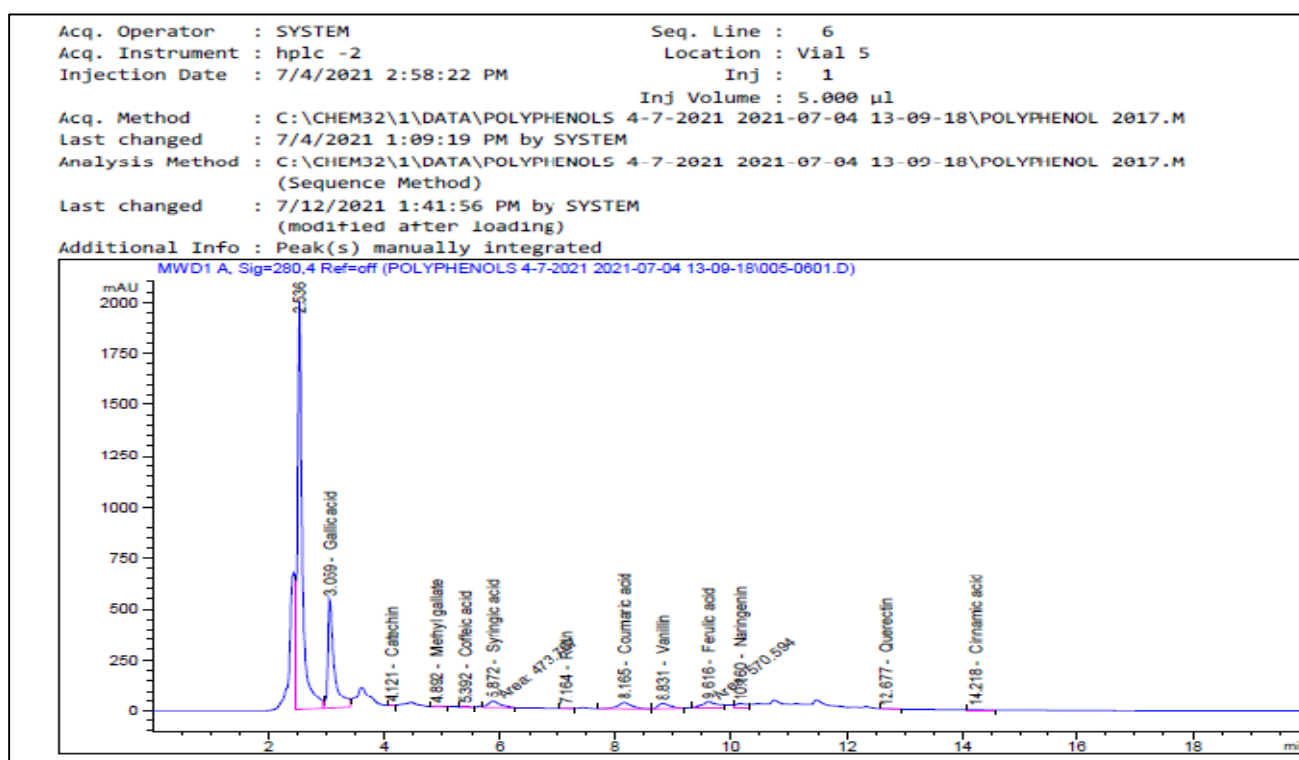

Figure S10: Phenolic compositions spectrum of *Suaeda aegyptiaca*

Acq. Operator : SYSTEM Seq. Line : 9  
 Acq. Instrument : hplc -2 Location : Vial 8  
 Injection Date : 7/4/2021 4:02:46 PM Inj : 1  
 Inj Volume : 5.000 µl  
 Acq. Method : C:\CHEM32\1\DATA\POLYPHENOLS 4-7-2021 2021-07-04 13-09-18\POLYPHENOL 2017.M  
 Last changed : 7/4/2021 1:09:19 PM by SYSTEM  
 Analysis Method : C:\CHEM32\1\DATA\POLYPHENOLS 4-7-2021 2021-07-04 13-09-18\POLYPHENOL 2017.M  
 (Sequence Method)  
 Last changed : 7/12/2021 1:55:56 PM by SYSTEM  
 (modified after loading)  
 Additional Info : Peak(s) manually integrated

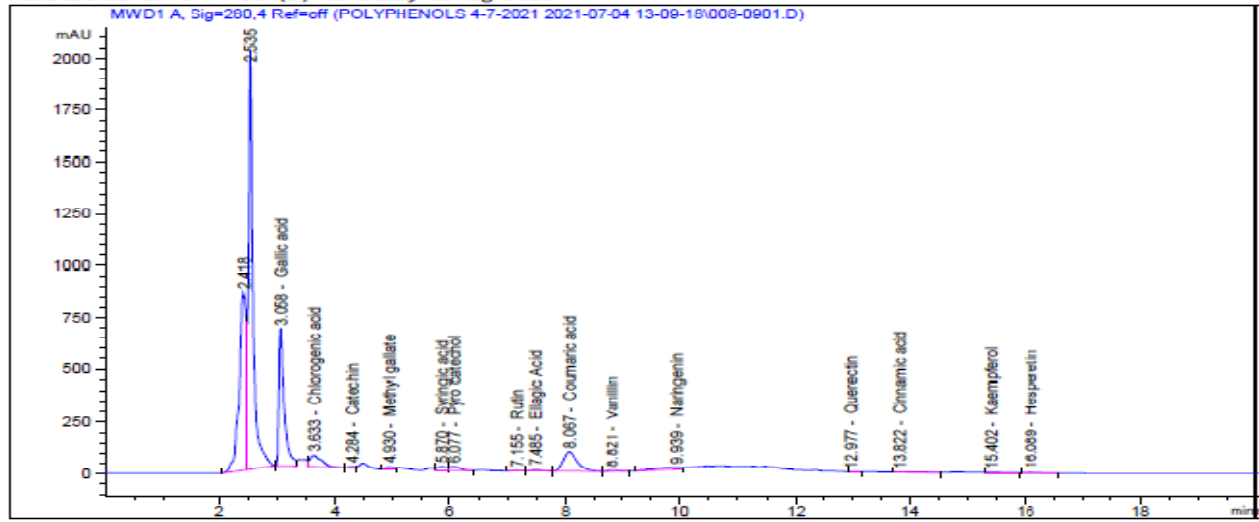

Figure S11: Phenolic compositions spectrum of *Saueda monoica*

Acq. Operator : SYSTEM Seq. Line : 7  
 Acq. Instrument : hplc -2 Location : Vial 6  
 Injection Date : 7/4/2021 3:19:50 PM Inj : 1  
 Inj volume : 5.000 µl  
 Acq. Method : C:\CHEM32\1\DATA\POLYPHENOLS 4-7-2021 2021-07-04 13-09-18\POLYPHENOL 2017.M  
 Last changed : 7/4/2021 1:09:19 PM by SYSTEM  
 Analysis Method : C:\CHEM32\1\DATA\POLYPHENOLS 4-7-2021 2021-07-04 13-09-18\POLYPHENOL 2017.M  
 (Sequence Method)  
 Last changed : 7/12/2021 1:41:56 PM by SYSTEM  
 (modified after loading)  
 Additional Info : Peak(s) manually integrated

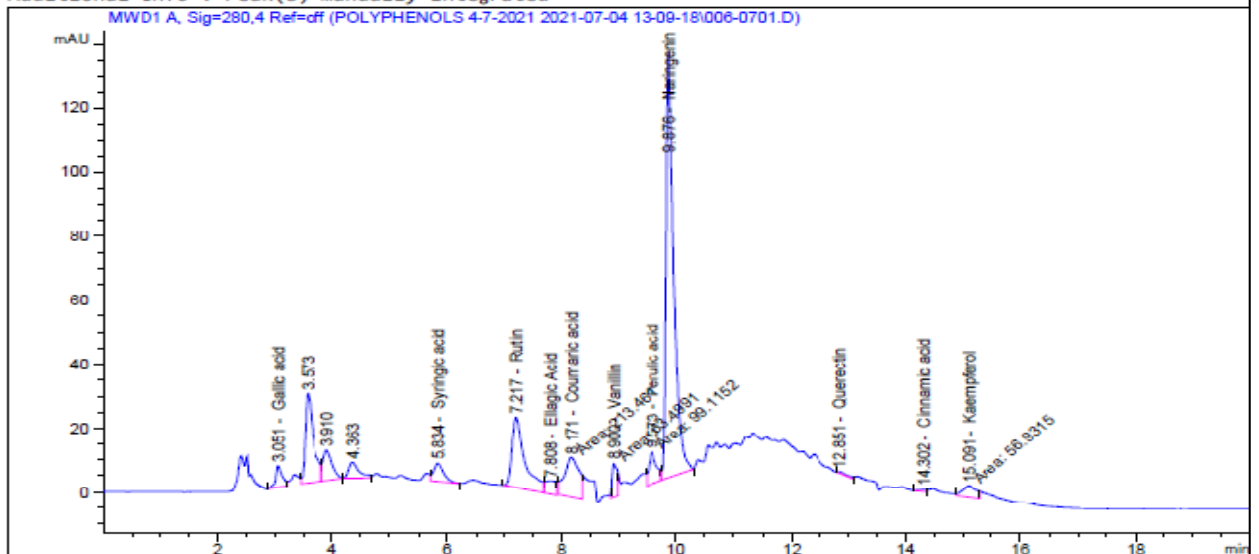

Figure S12: Phenolic compositions spectrum of *Zygophyllum album*

#### 4. Fatty acids compositions:

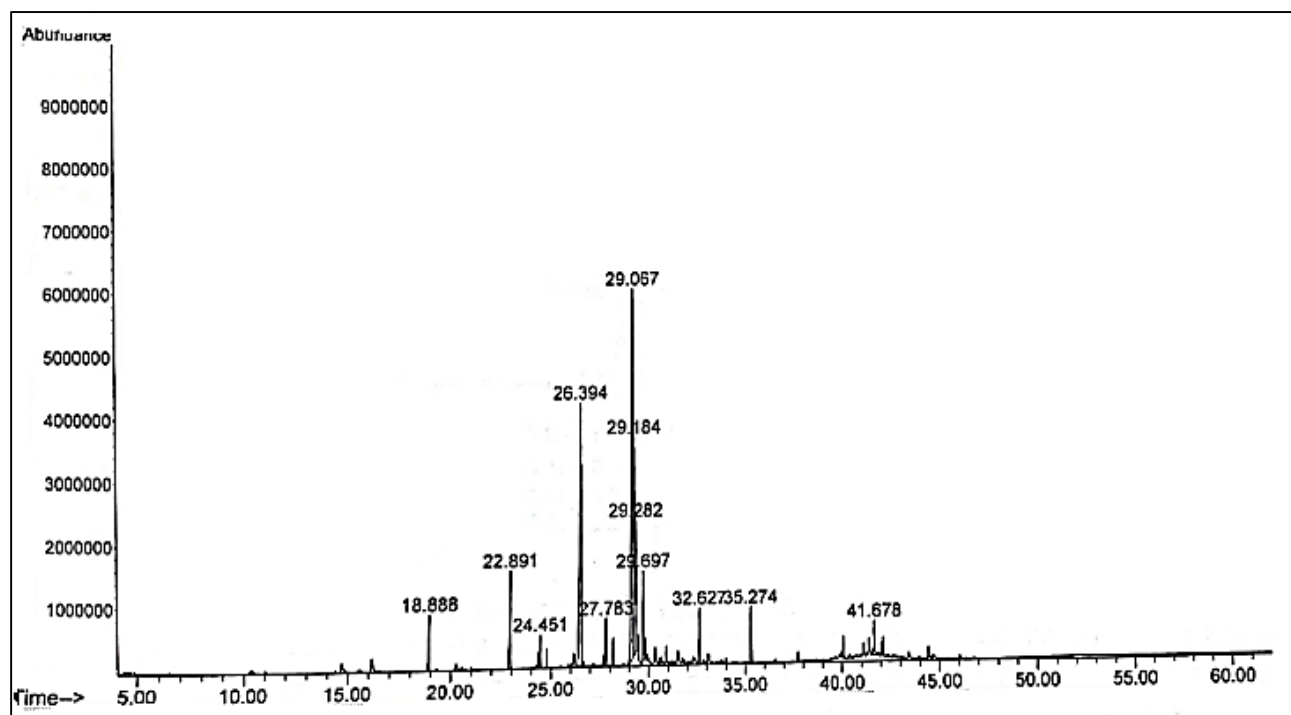

Figure S13: Fatty acids compositions spectrum of *Anabasis ehrenbergii*

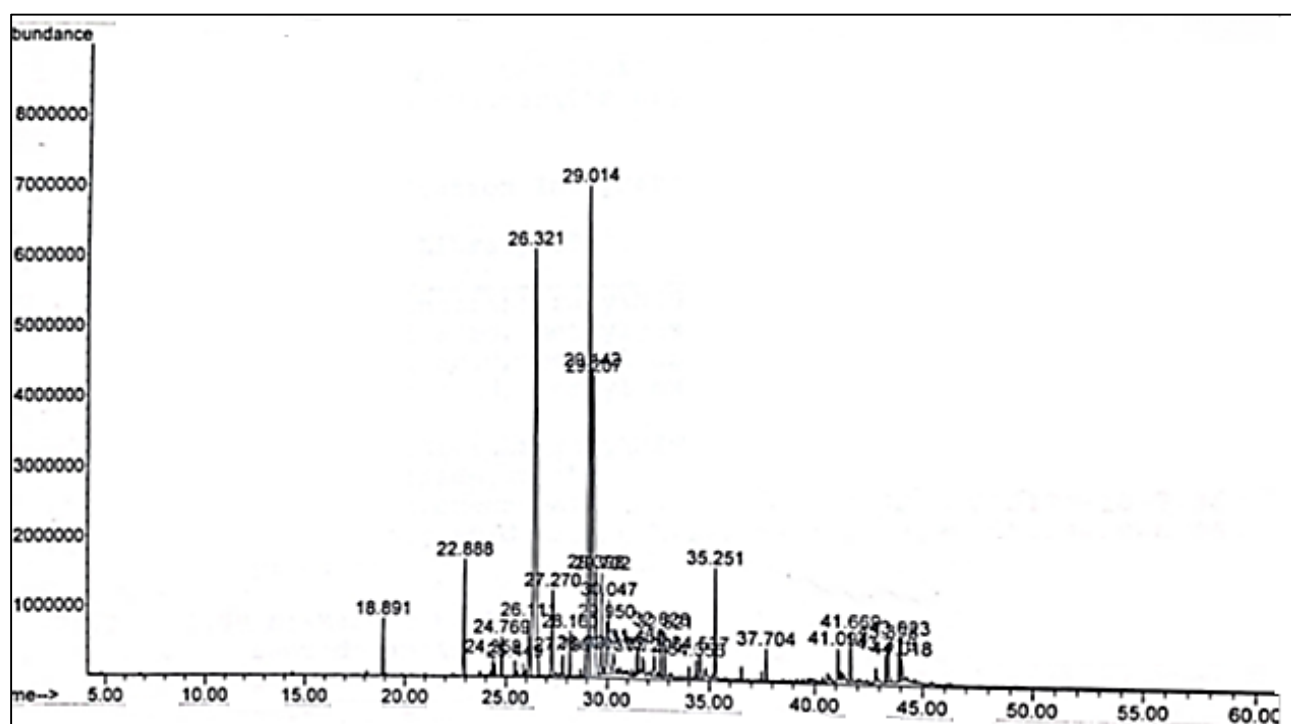

Figure S14: Fatty acids compositions spectrum of *Suaeda aegyptiaca*



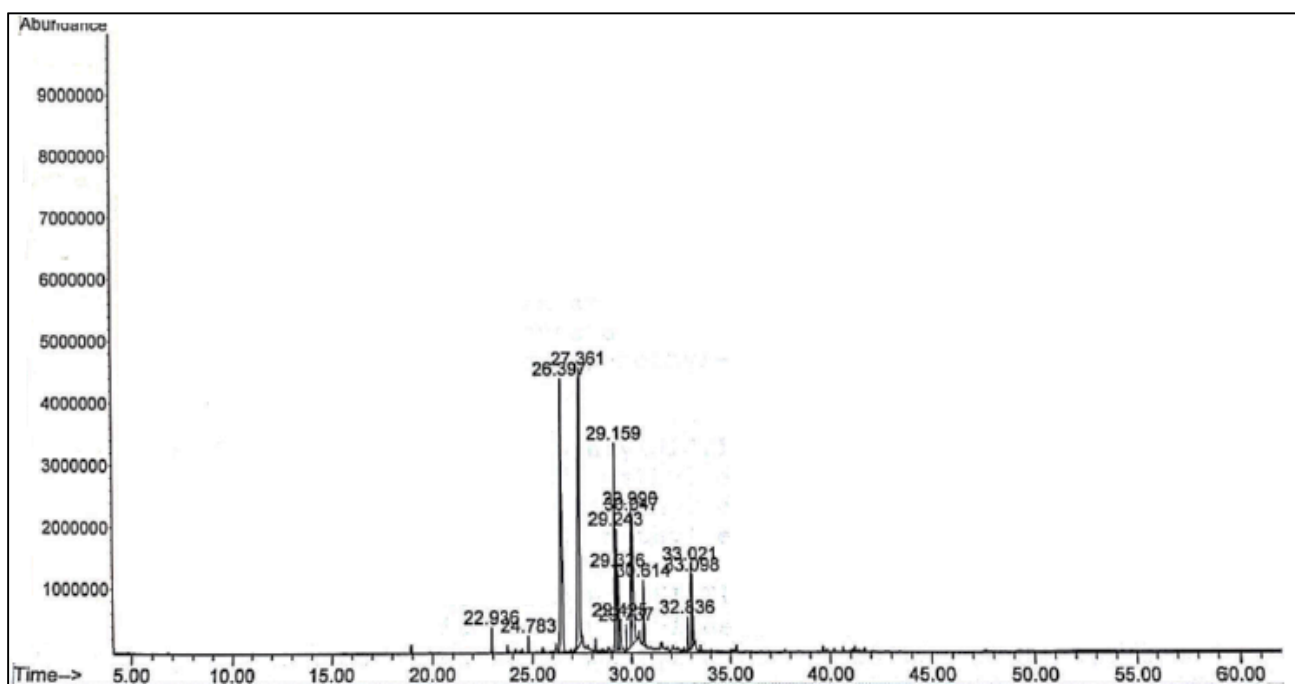

Figure S15: Fatty acids compositions spectrum of *Saueda monoica*

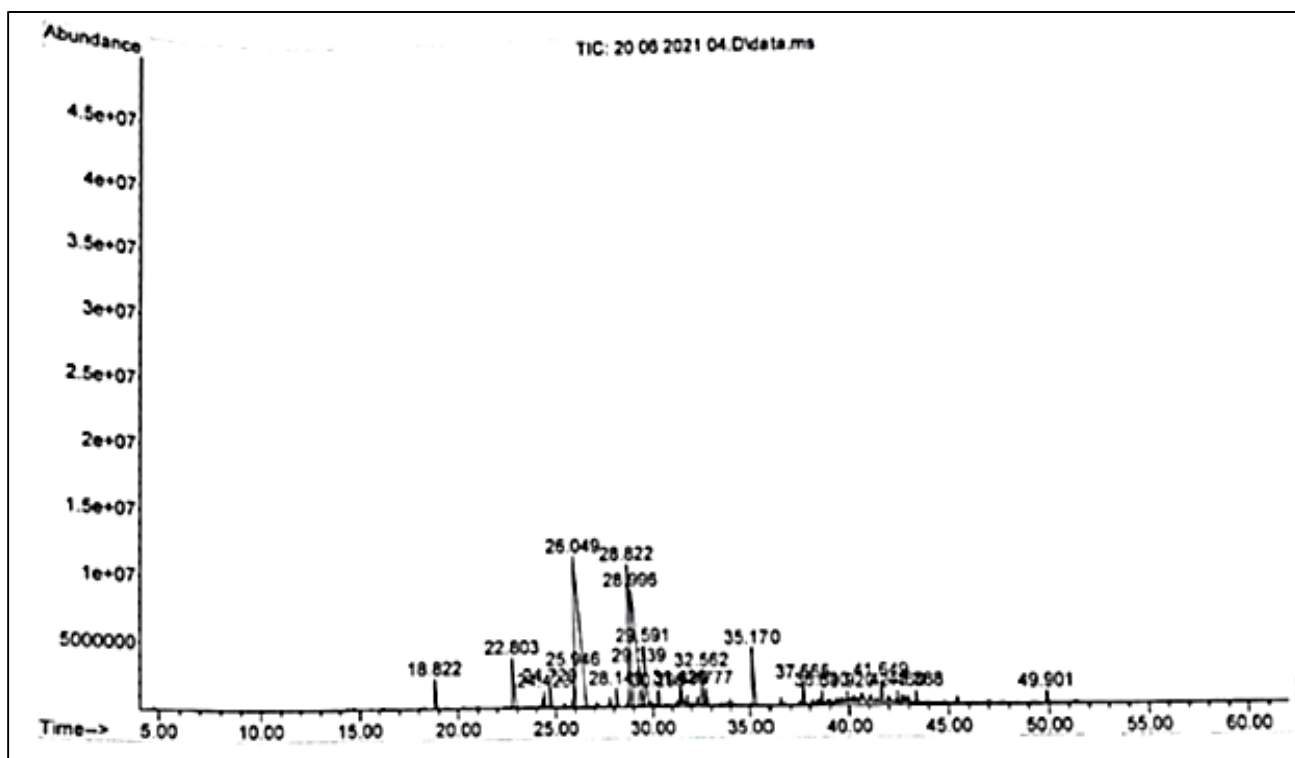

Figure S16: Fatty acids compositions spectrum of *Zygothallum album*

## 5. Unsaponifiable matter analysis:

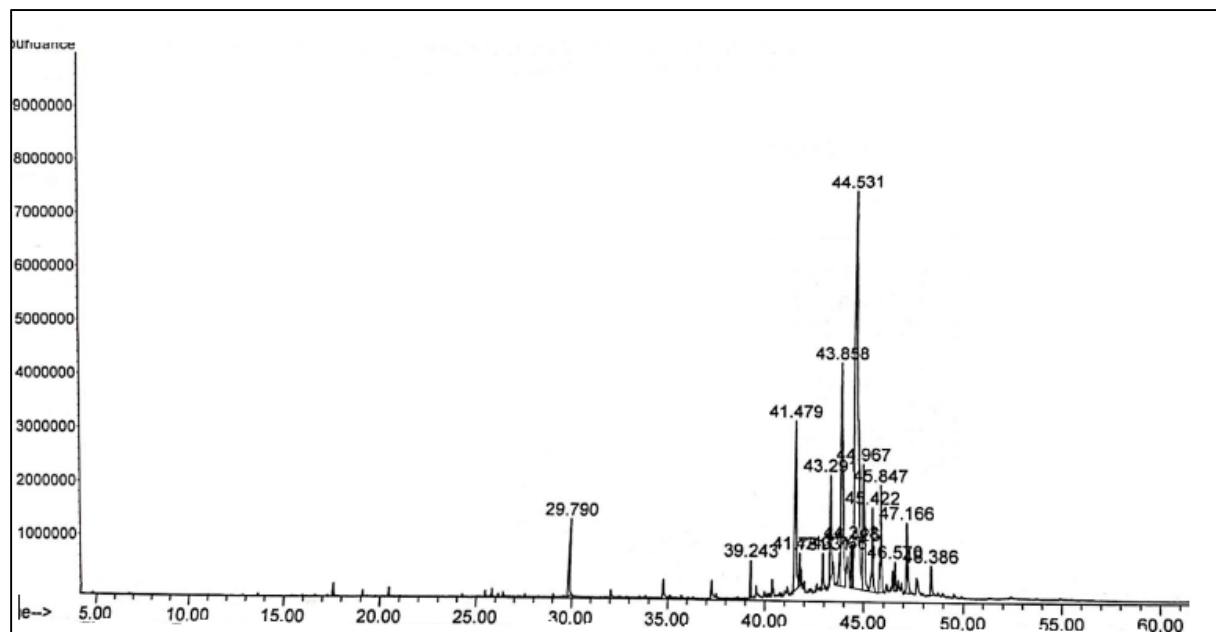

Figure S17: Unsaponifiable matter compositions spectrum of *Anabasis ehrenbergii*

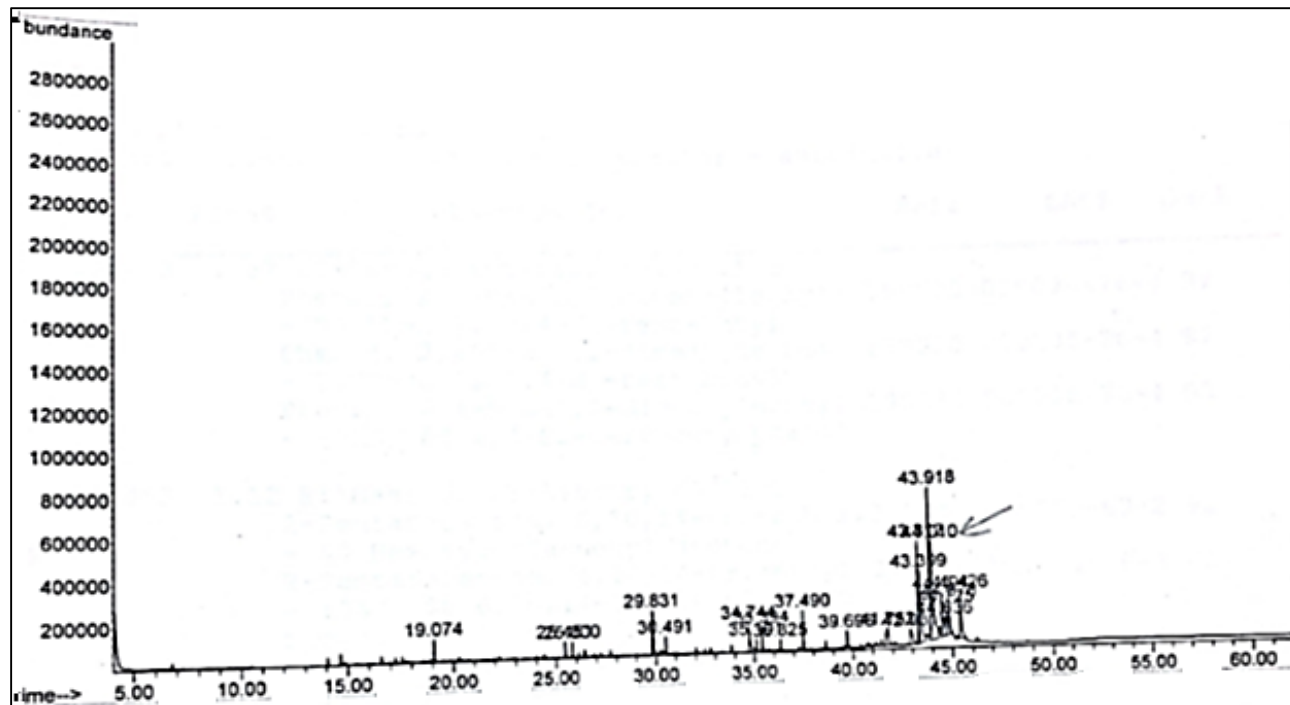

Figure S18: Unsaponifiable matter compositions spectrum of *Suaeda aegyptiaca*

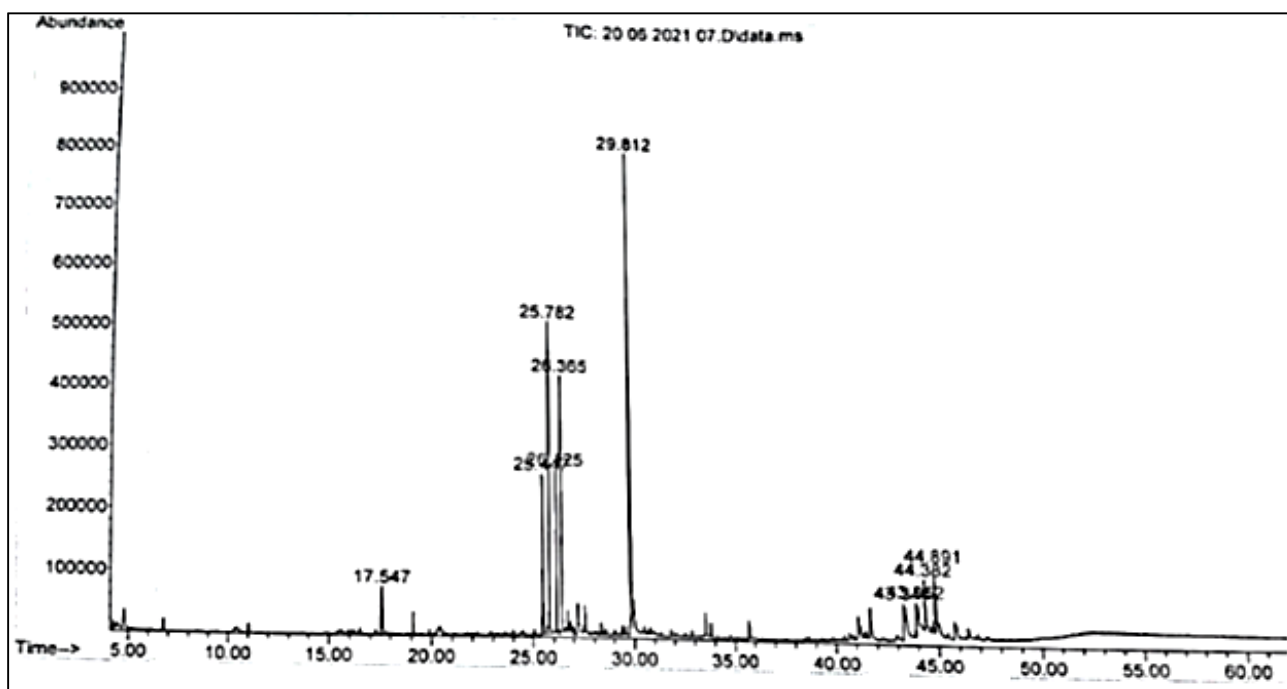

Figure S19: Unsaponifiable matter compositions spectrum of *Suaeda monoica*

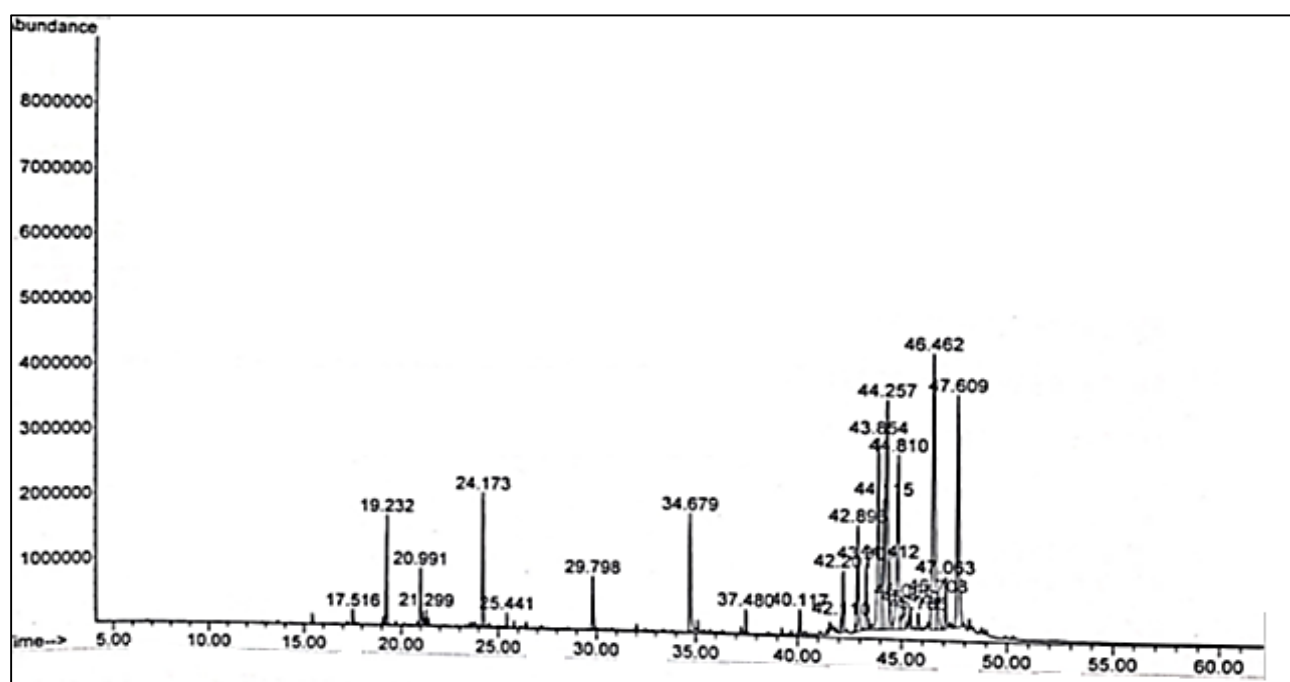

Figure S20: Unsaponifiable matter compositions spectrum of *Zygophyllum album*
